# Supplementary material for: Lignin depolymerisation by nickel supported layered-double hydroxide catalysts
Source: Royal Society of Chemistry journal article supplement (doi:10.1039/c3gc42138d), 2013-11-11
Supplement: c3gc42138d.pdf [file c3gc42138d.pdf]

## Supplementary Information (SI)

### Lignin depolymerisation by nickel supported layered-double hydroxide catalysts

Matthew R. Sturgeon<sup>a,b</sup>, Marykate H. O'Brien<sup>a,b</sup>, Peter N. Ciesielski<sup>c</sup>, Rui Katahira<sup>a</sup>, Jacob S. Kruger<sup>a</sup>, Stephen C. Chmely<sup>a,‡</sup>, Jessica Hamlin<sup>a,b</sup>, Kelsey Lawrence<sup>a,b</sup>, Glendon B. Hunsinger<sup>a</sup>, Thomas D. Foust<sup>a,b</sup>, Robert M. Baldwin<sup>a,b</sup>, Mary J. Bidy<sup>a,b,\*</sup>, Gregg T. Beckham<sup>a,b,\*</sup>

<sup>a</sup> National Bioenergy Center, National Renewable Energy Laboratory, Golden, Colorado, USA. Fax: +01-303-384-6363; Tel: +01-303-384-7806; \*E-mail: [gregg.beckham@nrel.gov](mailto:gregg.beckham@nrel.gov); [mary.bidy@nrel.gov](mailto:mary.bidy@nrel.gov)

<sup>b</sup> National Advanced Biofuels Consortium, National Renewable Energy Laboratory, Golden, Colorado, USA.

<sup>c</sup> Biosciences Center, National Renewable Energy Laboratory, Golden, Colorado, USA.

**Table S1.** EDS, ICP, and CHN Elemental Analysis of LDH Catalysts.

| Sample              | Elemental Composition (Wt %) |            |            |            |           |           | Hydrogen  | Nitrogen |
|---------------------|------------------------------|------------|------------|------------|-----------|-----------|-----------|----------|
|                     | Carbon                       | Oxygen     | Magnesium  | Aluminum   | Nickel    |           |           |          |
| Pre-reaction (EDS)  | 17.0 ± 4.2                   | 53.3 ± 2.1 | 17.8 ± 1.9 | 8.3 ± 1.0  | 3.0 ± 0.4 |           |           |          |
| Pre-reaction (ICP)  |                              |            | 24.4 ± 0.7 | 11.6 ± 0.4 | 3.6 ± 0.1 |           |           |          |
| Post-reaction (ICP) |                              |            | 22.5 ± 0.2 | 10.7 ± 0.2 | 3.3 ± 0.0 |           |           |          |
| Pre-reaction (CHN)  | 1.1 ± 0.4                    |            |            |            |           | 9.0 ± 0.1 | 0.5 ± 0.2 |          |
| Post-reaction (CHN) | 3.5 ± 0.4                    |            |            |            |           | 7.2 ± 0.1 | 0.3 ± 0.2 |          |
| Catalyst Wash (EDS) | 19.5 ± 7.4                   | 52.7 ± 2.8 | 18.5 ± 3.7 | 8.8 ± 2.3  | 3.2 ± 0.6 |           |           |          |

EDS was used for elemental mapping and loaded Ni distribution, wt% carbon in this technique is unreliable as samples were loaded onto carbon tape for analysis; therefore, carbon, hydrogen, and nitrogen were analysed via combustion. Catalyst wash refers to the freshly loaded catalyst after washing with hot (100°C) water. Calibrated ICP was used to determine metal content, and CHN was used to determine carbon content in Pre- and Post-reaction catalyst samples.

**Table S2.** Compounds identified in the GC/MS of CF-lignin and BM-lignin samples treated with 5 wt% Ni/HTC at 270°C for 1h.

#### Clean Fraction Lignin

| Retention time | Compound                                                         |
|----------------|------------------------------------------------------------------|
| 7.6924         | Furfural                                                         |
| 10.6863        | Furan, 2-methoxy-                                                |
| 11.2863        | Succinic acid, 2-methylpent-3-yl propyl ester                    |
| 11.6274        | 3-Buten-2-one, 4-(2-furanyl)-                                    |
| 12.1804        | Phenol, 4-ethyl-                                                 |
| 12.4098        | 3-Buten-2-one, 4-(2-furanyl)-                                    |
| 12.4627        | trans-Furfurylideneacetone                                       |
| 12.6862        | Benzofuran, 2,3-dihydro-                                         |
| 13.1038        | 2-Methoxyresorcinol                                              |
| 13.3215        | Phenol, 4-ethyl-2-methoxy-                                       |
| 13.6626        | 2-Methoxy-4-vinylphenol                                          |
| 14.0273        | 2-Butanone, 4-(4-methoxyphenyl)-                                 |
| 14.5508        | Vanillin                                                         |
| 16.0389        | Benzene, 1-methoxy-2-pentyl-                                     |
| 16.3507        | 3-Hexen-1-ol, 6-(2,6,6-trimethyl-1-cyclohexenyl)-4-methyl-, (E)- |

#### Ball Milled lignin

| Retention time | Compound                                     |
|----------------|----------------------------------------------|
| 9.9039         | Phenol                                       |
| 11.545         | Phenol, 2-methoxy-                           |
| 14.1037        | Phenol, 2,6-dimethoxy-                       |
| 14.733         | Vanillin                                     |
| 15.3977        | Ethanone, 1-(3-hydroxy-4-methoxyphenyl)-     |
| 16.774         | Benzaldehyde, 4-hydroxy-3,5-dimethoxy-       |
| 16.8858        | 3,5-Dimethoxybenzoic acid                    |
| 17.5681        | Ethanone, 1-(4-hydroxy-3,5-dimethoxyphenyl)- |

**Figure S1.** ICP analysis of pre- and post-reaction solutions

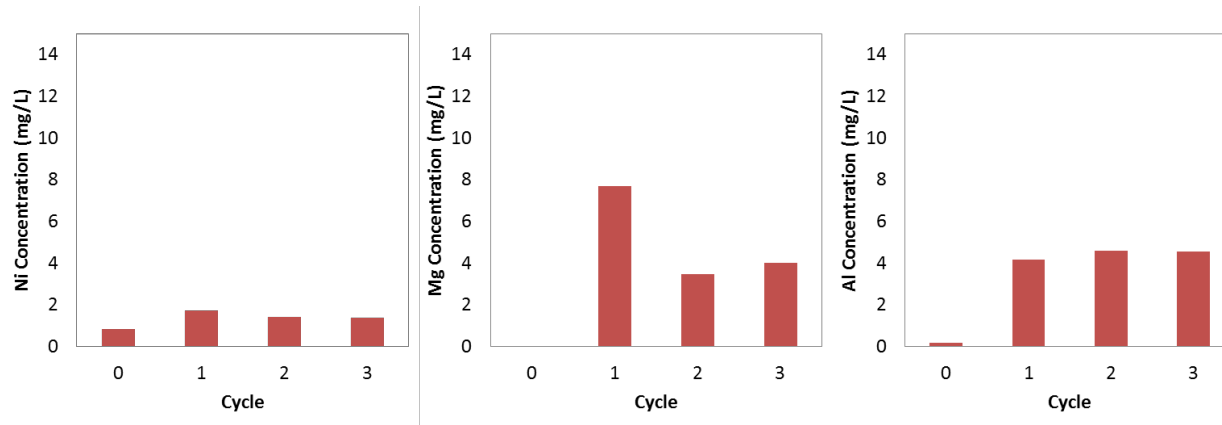

Figure S1 shows the concentrations of Ni, Mg, and Al in PE/MIBK solutions before reaction (Cycle 0) and after one, two, and three reaction cycles, as determined by ICP. Nickel concentrations after reaction are within experimental error of the nickel concentration before reaction, confirming that Ni leaching is negligible.
